# Supplementary material for: The combined detection of ovarian cancer biomarkers HE4 and CA125 by a fluorescence and quantum dot dual-signal immunoassay
Source: Royal Society of Chemistry journal article supplement (doi:10.1039/c9ay01454c), 2019-01-01
Supplement: c9ay01454c1.pdf [file c9ay01454c1.pdf]

## Supporting Information

1

### 2 **The Combined Detection of Ovarian Cancer Biomarkers HE4 and CA125** 3 **by a Fluorescence and Quantum Dot Dual-signal Immunoassay**

4 Shuang Yao <sup>a,1</sup>, Wei Xiao <sup>a,1</sup>, Hui Chen <sup>a</sup>, Yong Tang <sup>a</sup>, Qifang Song <sup>a</sup>, Qubo Zheng <sup>b,\*</sup>,

5 Ning Deng <sup>a,\*</sup>

6 <sup>a</sup> Department of Bioengineering, Guangdong Province Engineering Research Center of

7 Antibody drug and Immunoassay, Jinan University, Guangzhou 510632, PR China.

8 <sup>b</sup> 458th hospital of PLA, Guangzhou 510010, China.

9 \*Corresponding author. Ning Deng, Tel: (+86)-20-85227003, E-mail: tdengn@jnu.edu.cn.

10 Qubo Zheng, E-mail: 898359117@qq.com.

11 <sup>1</sup> These authors contributed equally to this work.

12

13  
14  
15  
16  
17  
18  
19  
20  
21  
22  
23  
24  
25  
26  
27  
28  
29  
30  
31  
32  
33  
34  
35  
36  
37  
38  
39  
40  
41

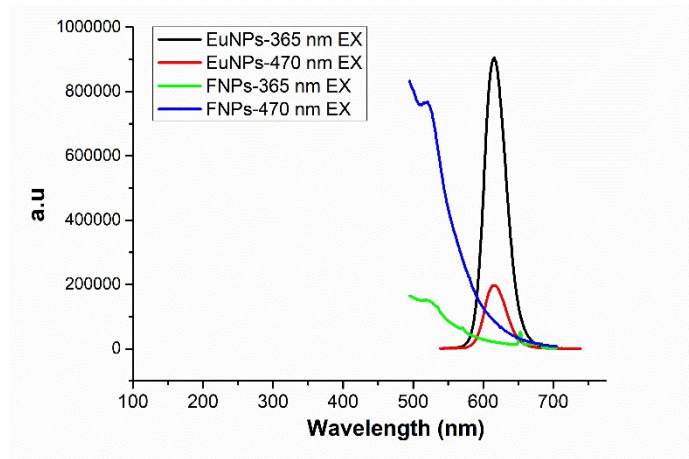

**Fig. S1** Corresponding photoluminescence emission spectra of FNPs, FNPs-HE4-Ab2, QDNBs and QDNBs-CA125-Ab2.

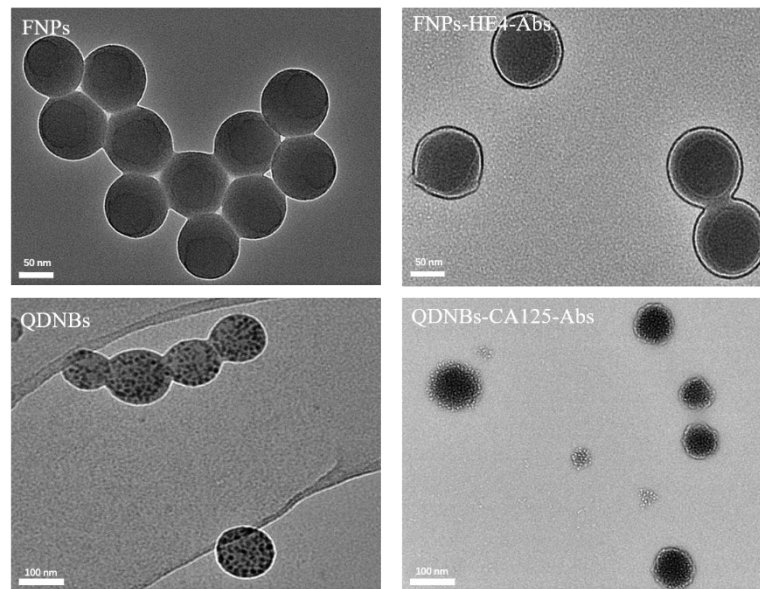

**Fig. S2** Transmission electron microscope (TEM) images of FNPs, FNPs-HE4-Ab2, QDNBs and QDNBs-CA125-Ab2.

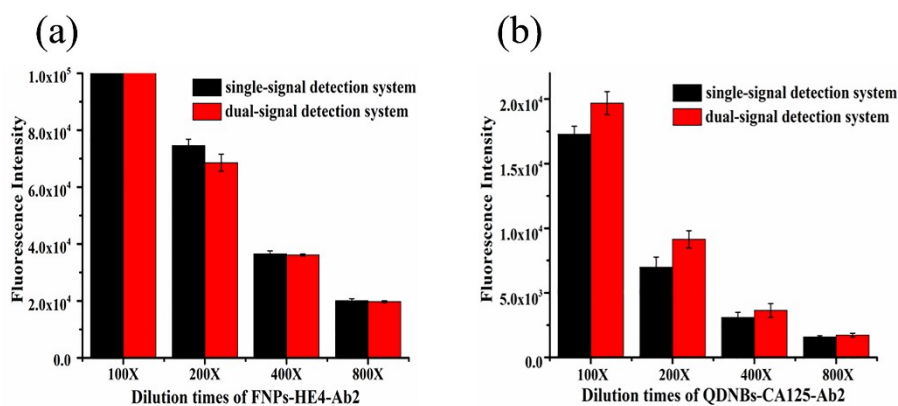

42  
 43 **Fig. S3** Fluorescence intensity of FNP-HE4-Ab2 in combined detection and single detection.  
 44 (c) Fluorescence intensity of QDNB-CA125-Ab2 in combined detection and single detection.

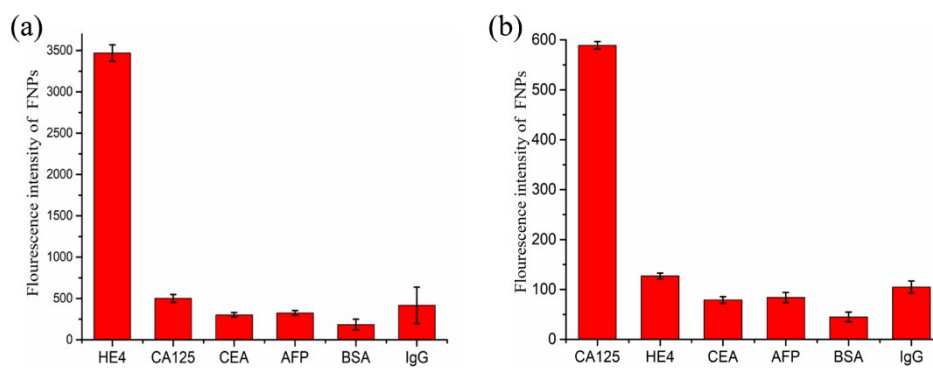

58 **Fig. S4** Selectivity of the single-signal system-based immunoassay. The selectivity of the  
 59 single-signal system-based immunoassay for HE4 (a) and CA125 (b), 5 ng mL<sup>-1</sup> for HE4,  
 60 100 U mL<sup>-1</sup> for CA125 and 50 ng mL<sup>-1</sup> for other proteins.

61  
 62  
 63 **Procedure of single-signal system-based immunoassay for HE4**  
 64 **and CA125 detection**

65 In this modified ELISA method, polystyrene microplates were modified with capture antibody of  
 66 HE4 and CA125 in coating buffer (0.05 mol/L CBS) at 37 °C for 45 min, respectively. After washing the  
 67 microplates three times with wash buffer (1% Tween-20 in 0.01 mol/L PBS), the microplates were  
 68 blocked with blocking buffer (5 mg/mL skim milk in PBS) at 4 °C overnight. Subsequently, the  
 69 microplates were washed three times with wash buffer and drying, which can be stored at -20°C for a  
 70 long time. When the microplates are used for testing, first wash it with wash buffer back to

71 room temperature, then different concentration HE4 and CA125 was added, respectively. After  
 72 60 min, the microplates were washed three times with wash buffer, and FNPs-HE4-Ab and  
 73 QDNBs-CA125-Ab was added at 37 °C for 45 min. Lastly, three washing steps were performed,  
 74 we used the multi-mode microwell reader simultaneous collected the corresponding data of  
 75 fluorescence and quantum dots. Different concentration of HE4 and CA125 from 0-20 ng/mL and 0-  
 76 200 U/mL were added to the single-signal detection system, and the fluorescence intensity of FNPs and  
 77 QDNBs were measured using the synergy H1 hybrid multi-mode microwell reader, respectively. The  
 78 results are shown in the **Fig. S5a-b**: the linear relationship of fluorescence intensity was determined  
 79 according to the standard curves of HE4 and CA125 concentrations.

80 **Fig.**

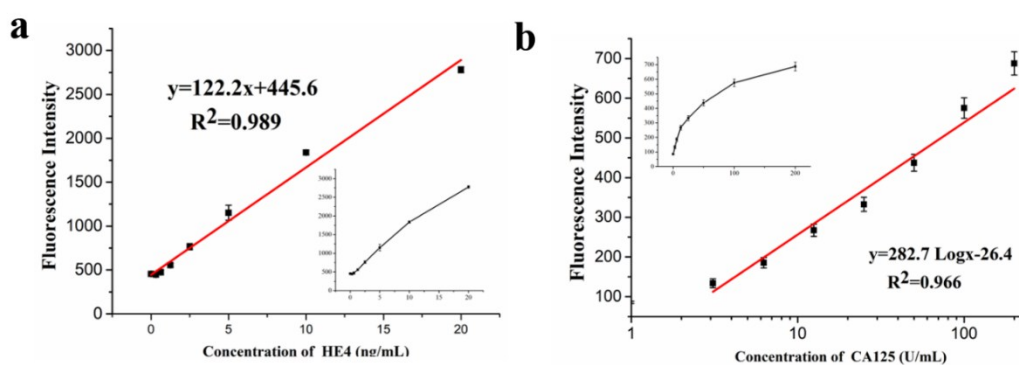

S5

82 Calibration curve of the single-signal system for HE4 (a) and CA125 (b) single detection.  
 83

84 **Table S1.** Comparison of the dual-signal system-based immunoassay and reported other  
 85 methods of HE4 and CA125 detection.

| Analytical methods                        | Analyte                                   | LDR                            | LOD                   | Reference  |
|-------------------------------------------|-------------------------------------------|--------------------------------|-----------------------|------------|
| Electrochemical                           | Just CA125                                | 10-100 U/mL                    | 5.5 U/mL              | [1]        |
| Nonenzymatic colorimetric immunodetection | Just CA125                                | 0.1-100 U/mL                   | 0.1 U/mL              | [2]        |
| Microchip ELISA                           | Just HE4                                  | 1-100 ng/mL                    | 19.5 ng/mL            | [3]        |
| Dual-signal system-based immunoassay      | Simultaneous immunoassay of HE4 and CA125 | 1.25-20 ng/mL<br>12.5-200 U/mL | 0.16 ng/mL<br>9.4 U/m | This work. |

86

## 87 Reference

88 1. Torati SR, Kasturi KC, Lim B, Kim C (2017) Hierarchical gold nanostructures modified electrode for

89 electrochemical detection of cancer antigen CA125. Sensors and Actuators B: Chemical 243:64-71  
90 2. Zhao Y, Zheng Y, Zhao C, You J, Qu F (2015) Hollow PDA-Au nanoparticles-enabled signal  
91 amplification for sensitive nonenzymatic colorimetric immunodetection of carbohydrate antigen 125.  
92 Biosensors and Bioelectronics 71:200-206  
93 3. Wang S, Zhao X, Khimji I, Akbas R, Qiu W, Edwards D, Cramer DW, Ye B, Demirci U (2011)  
94 Integration of cell phone imaging with microchip ELISA to detect ovarian cancer HE4 biomarker in urine at  
95 the point-of-care. Lab on a Chip 11 (20):3411-3418

96  
97

## 98 Appendix

### 临床实验声明

暨南大学生物工程学系因进行“卵巢癌标志物 HE4 和 CA125 双光谱联合检测方法”试验，需要广州解放军 458 医院肿瘤科协助完成该方法的临床验证实验，具体工作如下：

解放军 458 医院肿瘤科为本实验提供经过合理正规检测后的临床剩余血清样本，并提供具体的临床检测结果，同时征求患者本人同意。暨南大学生物工程学系利用新研究的联合检测方法再次对样本进行分析，然后将两种检测后的结果数据进行比较分析。本研究实验时间为 2018 年 9 月 1 日-2018 年 12 月 1 日。注：双方声明样本仅用于本方法的临床实验研究，不可用于其它研究项目；实验完成后，剩余样本应立刻由解放军 458 医院肿瘤科回收，并按照相关规定进行合理的处理。

负责人（签字）：



2018年6月17日

负责人（签字）：



2018年6月18日

99
